# Supplementary material for: Electro-optic characteristics of stabilized cholesteric liquid crystals with non-liquid crystalline polymer networks
Source: Royal Society of Chemistry journal article supplement (doi:10.1039/d2sm00203e), 2022-01-01
Supplement: d2sm00203e1.pdf [file d2sm00203e1.pdf]

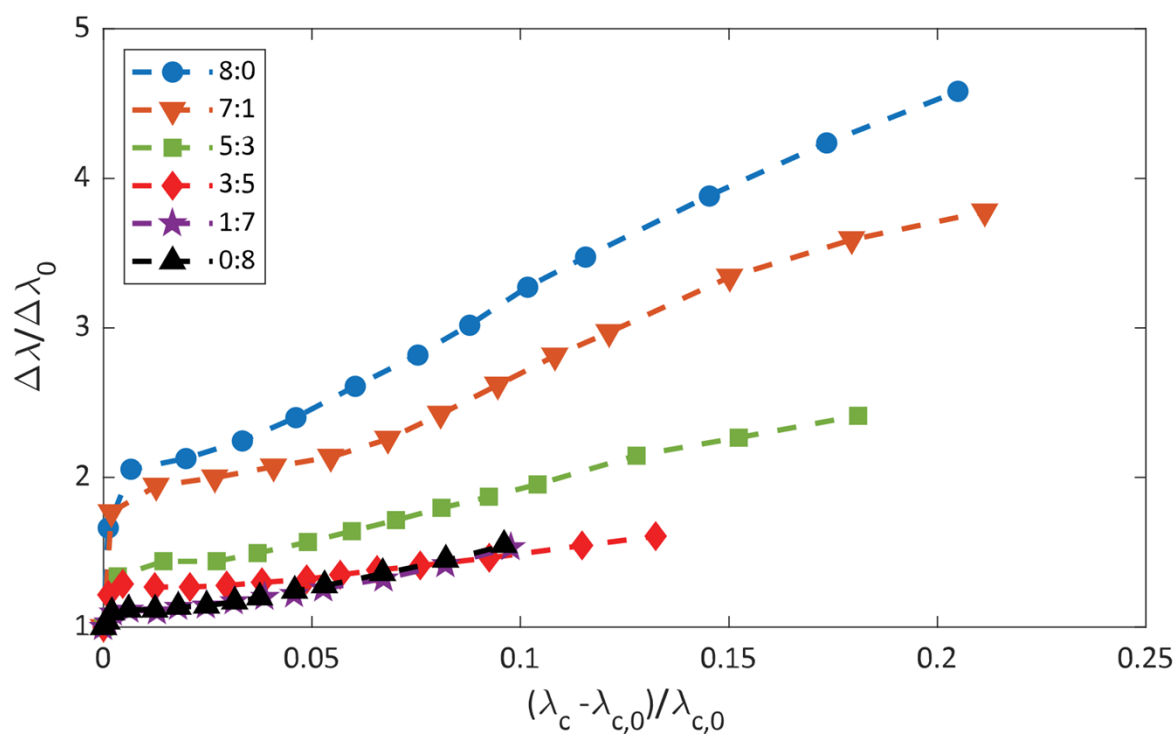

**Fig. S1** Change in the normalized reflection bandwidth versus the normalized reflection notch center for samples prepared with 8wt% monomer, 5wt% S1011, 5wt% S811, 1wt% I-369 in MLC-2079. The weight ratio of RM82: HDDA was changed between each sample as indicated in the legends. Polymerization was initiated by UV light (365nm, 50 mW/cm<sup>2</sup>) for 10 min.
